# Supplementary material for: Distinct cellulose nanofibrils generated for improved Pickering emulsions and lignocellulose-degradation enzyme secretion coupled with high bioethanol production in natural rice mutants
Source: Royal Society of Chemistry journal article supplement (doi:10.1039/d1gc04447h), 2022-01-01
Supplement: d1gc04447h1.pdf [file d1gc04447h1.pdf]

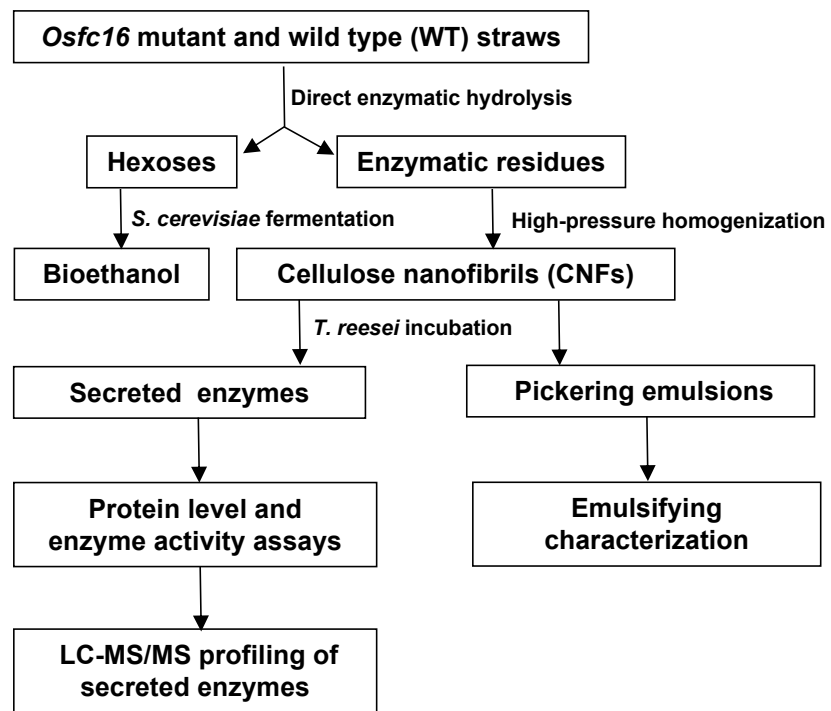

**Fig. S1** Flow chart of rice straw process to produce bioethanol and to generate cellulose nanofibrils for Pickering emulsions stabilizers and cellulases inducers.

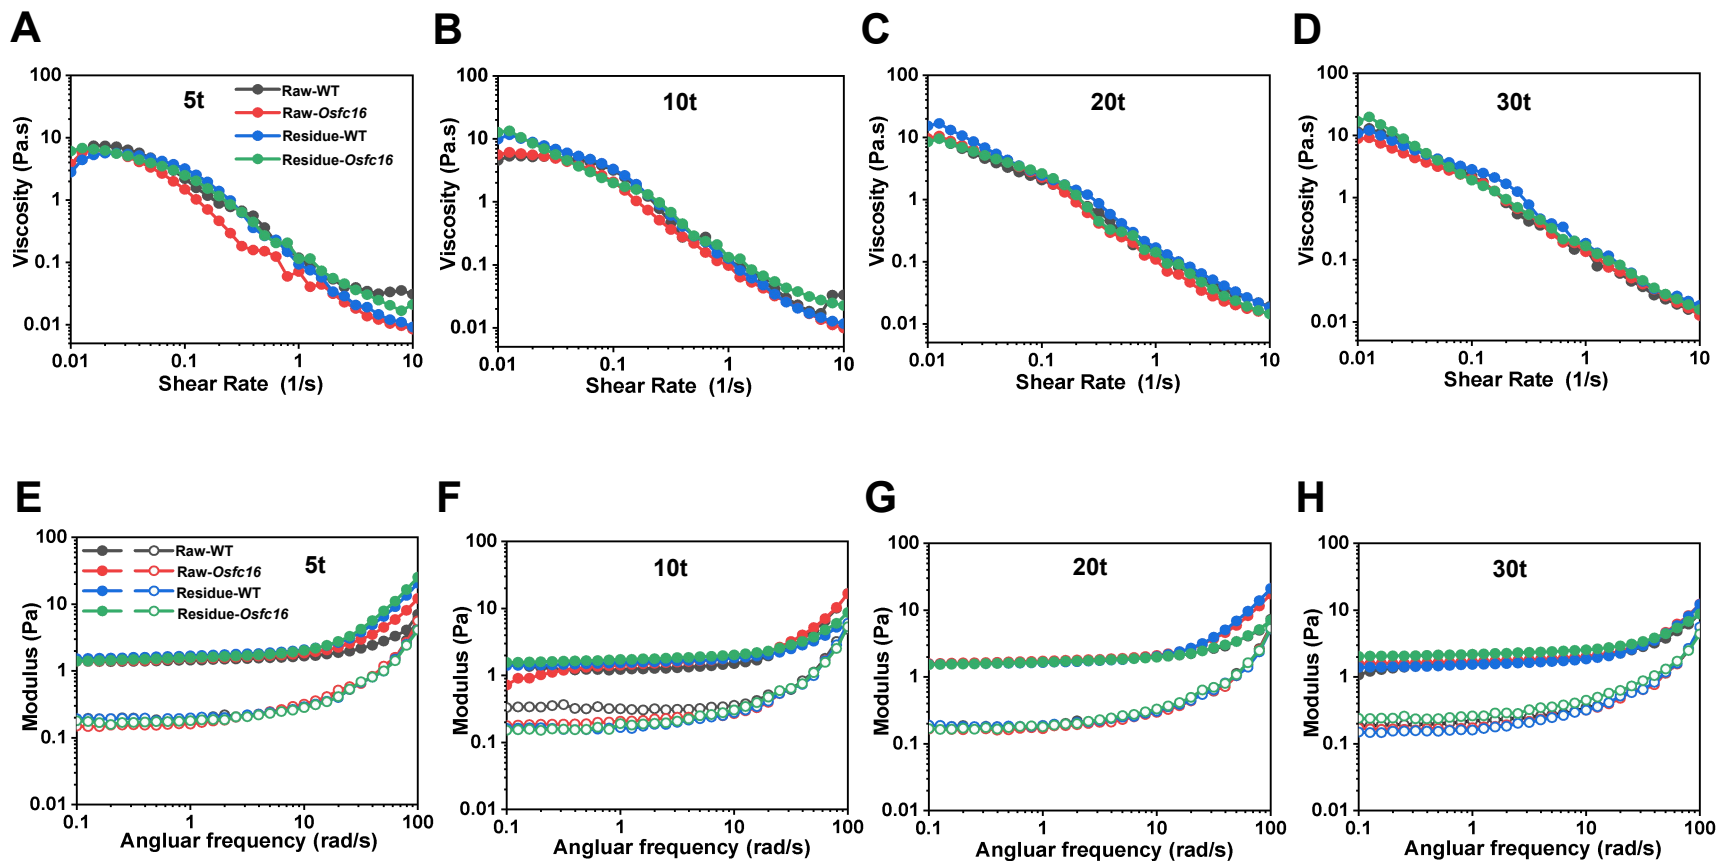

**Fig. S2** Rheological properties of Pickering emulsions with 0.1% CNFs generated from the *Osfc16* and WT samples. (A-D) Apparent viscoelastic as a function of shear rate; (E-H) Storage modulus (closed symbols) and loss modulus (open symbols) as a function of angular frequency measured at 0.65% strain.

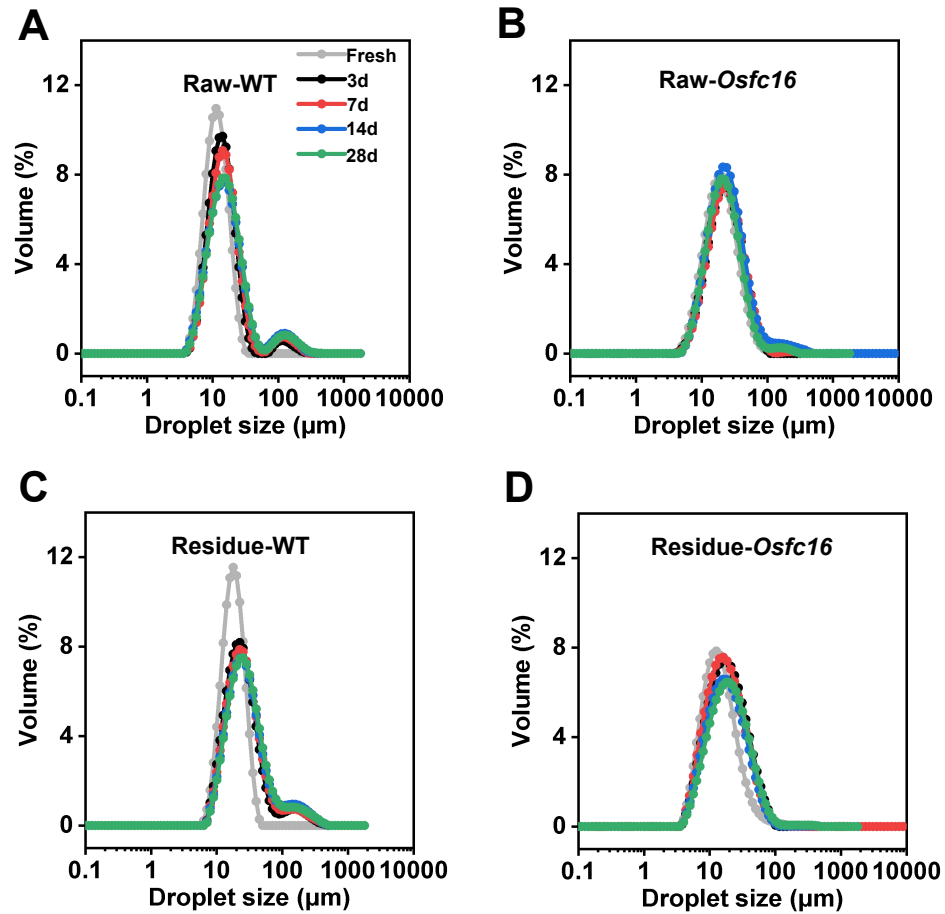

**Fig. S3** Particle size distribution of Pickering emulsions with 0.1% CNFs under different storage times. (A, B) HPH-20t of raw straws from the *Osfc16* and WT samples; (C, D) HPH-10t of enzymatic residues.





**Table S1** Comparison of cellulose and hemicellulose levels in raw straws and residues from direct enzymatic hydrolyses between WT(NPB) and mutant(*Osf16*)

| <b>Material</b>       | <b>Cellulose<br/>(% Dry Matter)</b> | <b>SD</b> | <b>Hemicellulose<br/>(% Dry Matter)</b> | <b>SD</b> |
|-----------------------|-------------------------------------|-----------|-----------------------------------------|-----------|
| Raw-WT                | 29.24                               | 0.60      | 21.61                                   | 0.45      |
| Raw- <i>Osf16</i>     | 20.02                               | 0.56      | 24.79                                   | 0.65      |
| Residue-WT            | 36.28                               | 0.36      | 34.24                                   | 0.81      |
| Residue- <i>Osf16</i> | 24.66                               | 0.87      | 40.45                                   | 1.79      |

**Table S2** Characteristic chemical bonds of the FT-IR spectra presented in Fig. 7

| Reported<br>wave number<br>(cm <sup>-1</sup> ) | Observed<br>wave number<br>(cm <sup>-1</sup> ) | Functional group                     | Assignment    | References |
|------------------------------------------------|------------------------------------------------|--------------------------------------|---------------|------------|
| 829                                            | 823                                            | C-H breathing                        | H-lignin      | 59         |
| 898                                            | 897                                            | C-H vibration                        | Cellulose     | 59         |
| 1045                                           | 1040                                           | C-O-C                                | Cellulose     | 60         |
| 1051                                           | 1058                                           | C-O-C ring skeletal vibration        | Hemicellulose | 6          |
| 1163                                           | 1164                                           | C-O-C asymmetric stretching          | Cellulose     | 61         |
| 1247                                           | 1245                                           | C-O-C stretching of aryl-alkyl ether | Lignin        | 59         |
| 1373                                           | 1368                                           | C-H <sub>2</sub> scissoring          | Cellulose     | 62         |
| 1515                                           | 1510                                           | C=C stretching of the aromatic ring  | Lignin        | 63         |
| 1632                                           | 1636                                           | -C=O stretching from CO-OR           | Pectin        | 64         |

Peaks highlighted in red as altered ones in two residues samples relative to raw control sample (without *T. reesei* incubation).
